1 **Role of competition in the strain structure of rotavirus under**  
2 **invasion and reassortment**

3 *Author Affiliation:*

4 Daniel Zinder<sup>a</sup>, Maria A Riolo<sup>b</sup>, Robert J. Woods<sup>c</sup>, Mercedes Pascual<sup>a,d,\*</sup>

5

6 **a** University of Chicago, Ecology and Evolution, 1101 E 57th Street, Chicago, IL 60637, USA

7

8 **b** University of Michigan, Center for the Study of Complex Systems, 321 W Hall, 1085 S

9 University Ave, Ann-Arbor, MI 48109, USA

10

11 **c** University of Michigan, Department of Internal Medicine, University of Michigan Medical

12 School, 1150 W Medical Center Dr., Ann-Arbor, MI 48109, USA

13

14 **d** Santa Fe Institute, Santa-Fe, NM 87501, USA

15

16 \* corresponding author

17 *Corresponding author:*

18 E-mail: [pascualmm@uchicago.edu](mailto:pascualmm@uchicago.edu)

19 Mail: University of Chicago, Ecology & Evolution, 1101 E 57th Street, Chicago, IL 60637,

20 USA Phone: (773) 795-2354 - office, lab - (773) 795-0970

21

22 ABSTRACT

23 The role of competitive interactions in the formation and coexistence of viral strains remains  
24 unresolved. Neglected aspects of existing strain theory are that viral pathogens are repeatedly  
25 introduced from animal sources and readily exchange their genes. The combined effect of  
26 introduction and reassortment opposes strain structure, in particular the predicted stable  
27 coexistence of antigenically differentiated strains under strong frequency-dependent selection  
28 mediated by cross-immunity. Here we use a stochastic model motivated by rotavirus, the most  
29 common cause of childhood diarrheal mortality, to investigate serotype structure under these  
30 conditions. We describe a regime in which the transient coexistence of distinct strains emerges  
31 despite only weak cross-immunity, but is disturbed by invasions of new antigenic segments  
32 that reassort into existing backgrounds. We find support for this behavior in global rotavirus  
33 sequence data and present evidence for the displacement of new strains towards open antigenic  
34 niches. Our work extends previous work to bacterial and viral pathogens that share these  
35 rotavirus-like characteristics, with important implications for the effects of interventions such  
36 as vaccination on strain composition, and for the understanding of the factors promoting  
37 emergence of new subtypes.

38

39

40

## 41 INTRODUCTION

42 Understanding how pathogen variation is generated, structured and maintained is a central  
43 question in disease ecology and is of fundamental importance to epidemiology. Ultimately,  
44 such research requires the synthesis of a wide set of fields including evolutionary,  
45 epidemiological, immunological, and ecological dynamics<sup>1</sup>. A major body of theoretical work  
46 at this intersection posits that the combined immunity of the host population can drive  
47 pathogens to differentiate into groups with reduced immune cross-reactivity, as intermediate  
48 hybrids are suppressed by the protection of the population to the established parental strains<sup>2-7</sup>.  
49 This organization into discrete strains as the result of ‘immune selection’ relates to ideas at the  
50 core of theoretical ecology including competitive exclusion, niche differentiation, character  
51 displacement and limiting similarity, suggesting that species cannot stably coexist when using  
52 a single resource, and that the boundaries of realized (or occupied) niches are set by  
53 competition<sup>8-12</sup>. However, in previous models of niche differentiation the dynamic role of  
54 evolution in the maintenance and formation of these niches was only partially explored, and  
55 establishing empirical evidence for a role of non-neutral processes in the coexistence of diverse  
56 communities has been challenging<sup>12-14</sup>.

57

58 In the context of pathogens, the role of mutation and recombination in niche differentiation has  
59 been evaluated under competitive interactions mediated by a high level of serotype-specific  
60 immunity and for a restricted set of antigenic variants from a ‘finite pool’<sup>4-6</sup>. Here, instead we  
61 consider low levels of specific immunity and an unlimited antigenic reservoir so that we can  
62 address the structure and dynamics of serotype diversity in rotavirus A (RVA), the leading  
63 cause of diarrheal deaths in children worldwide. RVA experiences recurrent introductions of  
64 antigenic novelty through zoonotic transmission, as well as frequent reassortment between its  
65 segments and weaker specific (homotypic) than generalized (heterotypic) immunity. These are

66 additional processes which potentially undermine strain structure and coexistence. For  
67 pathogen populations, antigenic variants are the traits mediating frequency-dependent  
68 competition for hosts, with an advantage of the rare and the disadvantage of the common, akin  
69 to stabilizing competition between species<sup>15</sup>. We ask whether strain structure can still emerge  
70 from competition for host immune space under these rotavirus-like conditions, and whether  
71 there are signatures of such non-neutral process in global sequence data.

72

73 Rotavirus A (RVA) is a non-enveloped virus, with 11 double stranded RNA genome segments.  
74 Two outer capsid proteins VP4 (P types) and VP7 (G types) are the major antigens, often used  
75 for classification of rotavirus into genotypes (e.g. G1P[8], G3P[8], G9P[6]) because of their  
76 role in the generation of humoral immunity<sup>16,17</sup>. There is evidence of increased protection  
77 against infections by the same genotype<sup>18,19</sup> yet a large component of immunity is  
78 heterotypic<sup>20-22</sup>. At a segment level, each segment type (e.g. G1, G12 etc.) corresponds to a  
79 monophyletic cluster, and includes either single or multiple cross-species transmission into  
80 humans from animal sources<sup>23</sup>. Although mutation is responsible for a certain degree of  
81 antigenic change within individual G types (e.g. within G1), its role in the antigenic evolution  
82 of rotavirus within the human population is thought to be limited<sup>24,25</sup>. Multiple G and P types  
83 have been described, and in contrast to influenza, serotypes coexist and undergo frequent  
84 reassortment<sup>26,27</sup>. Several of the discovered G and P types are more abundant than others, and  
85 only a small fraction of all possible genotypes of RVA have been reported<sup>17,20,26,28</sup>. This has  
86 been attributed to a balance between preferred genome constellations and reassortment<sup>26</sup>, and  
87 there is evidence that these constellations have an improved fitness unrelated to immunity<sup>29</sup>.  
88 However, it should be noted that in the absence of specific immunity or an alternative type of  
89 niche differentiation (e.g. host and tissue tropism), hosts act as a single resource and simple  
90 ecological and epidemiological models predict competitive exclusion by the strain with the

91 largest basic reproductive number<sup>8,30</sup>. Mechanisms for stable co-existence in the absence of this  
92 type of niche differentiation exist but have not been observed for rotavirus<sup>31–34</sup>.

93

94 The frequency of circulating rotavirus serotypes varies over time and across global geographic  
95 regions<sup>28</sup>. On a local level circulating serotypes are often partially or fully replaced after being  
96 common in a region for several years<sup>35–37</sup>, yet those can re-emerge at later periods. These  
97 replacement dynamics, taken together with possible changes in serotype prevalence following  
98 vaccination<sup>38–40</sup> suggest that selective pressures generated by host immunity can drive changes  
99 in circulating serotypes. However, the role of such immune selection (stabilizing competition)  
100 in the maintenance and structure of rotavirus serotypes has not been established. Motivated by  
101 important challenges in rotavirus, we formulate a stochastic transmission model including  
102 antigenic evolution to investigate how serotype structure is generated and maintained. Our  
103 work extends the dynamic regimes previously identified by strain theory and phylodynamic  
104 models, to include the introduction of antigenically novel segments from the zoonotic  
105 introduction of alleles<sup>1,2,5,6</sup>. Empirical patterns in the global sequence data for the virus are  
106 consistent with our simulation. An improved model of how strain communities are generated  
107 and maintained provides a basis to also understand their expected response to human  
108 interventions, as well as the factors that promote or hinder the invasion of new subtypes and  
109 serotypes in rotavirus and other pathogens.

110

## 111 RESULTS

### 112 **Strain structure in a model motivated by rotavirus**

113 An individual-based SIR model explicitly tracks the chains of infection by viral lineages as  
114 well as the antigenic phenotype of every virus in the population. A virus in the model is  
115 composed of three antigenic segments (e.g. A, B, C), each segment allele (e.g. A<sub>3</sub>) representing

116 a unique serotype, with a combination of such alleles representing a viral strain (e.g.  $A_1B_2C_2$ ).  
117 Novel alleles (e.g.  $C_3$ ) are introduced into existing backgrounds (e.g.  $A_1B_2C_2 \rightarrow A_1B_2C_3$ ). The  
118 model was modified from previous models<sup>6,41</sup> to include reassortment and the genealogical  
119 tracking of each viral segment independently. Immunity and infectivity are also different from  
120 the cited models, and in particular both generalized (heterotypic) and specific (homotypic)  
121 immunity are included, as described in detail in Materials and Methods.

122

123 One striking feature of rotavirus epidemiology is the dramatic shift in serotypes in the absence  
124 of major shifts in yearly incidence. This pattern contrasts with that of other viruses such as  
125 influenza where the emergence of new antigenic variants typically implies epidemic behavior  
126 with an increase in attack rates<sup>42</sup>. To capture the year-to-year variation in incidence, we  
127 calculated the two-year coefficient of variation in rotavirus positive cases from 2001-2012  
128 from a cohort study of infants in Bangladesh<sup>36</sup>, as  $CV=0.04$ , where CV is the standard  
129 deviation divided by the mean fraction of rotavirus positive cases. To compare how variable, or  
130 stable, infection levels in our simulations are, we plot the coefficient of variation for  
131 prevalence with varying parameters.

132

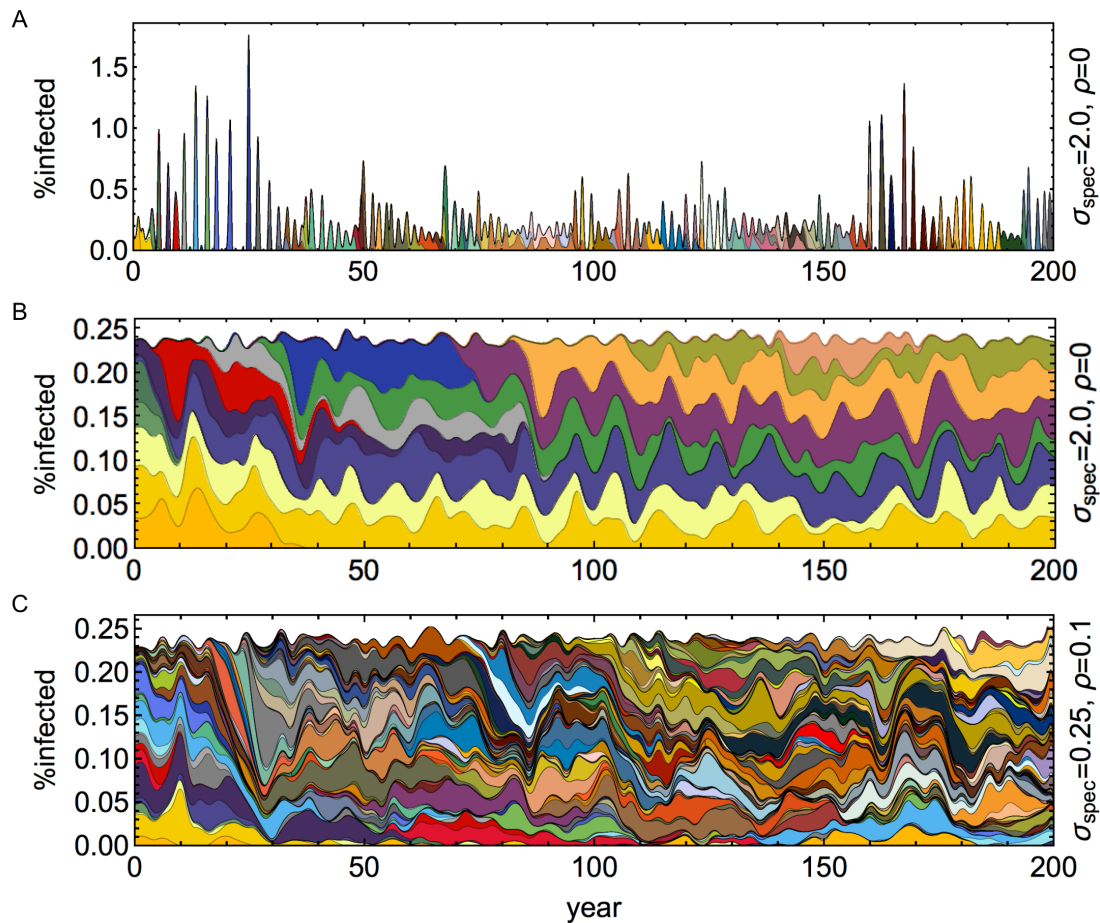

133

134 *Figure 1 Contrasting serotype dynamics with varying specific immunity and reassortment rates* Cumulative prevalence,  
135 *color coded by serotype (unique combination of three segments) for varying specific immunity ( $\sigma_{\text{spec}}$ ) and reassortment ( $\rho$ )*  
136 *rates. The specific example in A illustrates the replacement regime. B and C illustrate the coexistence regime with*  
137 *reassortment. A. High specific immunity ( $\sigma_{\text{spec}} = 2.0$ ), leading to the sequential replacement of serotypes coupled with high*  
138 *incidence variability and epidemic dynamics. B. With low specific immunity ( $\sigma_{\text{spec}} = 0.25$ ) in the absence of reassortment*  
139 *( $\rho = 0$ ) invasions occurring on existing backgrounds have a temporary frequency-dependent advantage and gradually*  
140 *displace existing serotypes. C. In the presence of reassortment ( $\rho = 0.1$ ), invading segments reassort with multiple*  
141 *backgrounds and transiently disrupt serotype structure. (additional parameters:  $\beta=3.51$ ,  $\sigma_{\text{gen}}=0.4$ ,  $i_1=8 \text{ year}^{-1}$ )*

142 Parameter ranges for generalized and specific immunity were chosen to match published  
143 rotavirus clinical data. The range of generalized immunity considered, was determined by  
144 fitting the probability of reinfection in a cohort of Indian children ( $\sigma_{\text{gen}}=0.4$ ) and including a  
145 wide range above and below that estimate ( $\sigma_{\text{gen}}=0.2-0.6$ )<sup>43</sup> (Figure S1). With this estimate of

146 generalized immunity, we observe stable infection levels, characteristic of rotavirus when there  
147 is low specific immunity ( $\sigma_{\text{spec}}=0.25$ ) (**Figure S2**). As the value of specific immunity is  
148 increased, epidemic dynamics coupled by the full or partial sequential replacement of strains  
149 occur, similar to influenza, (**Figure 1A**).

150

151 We then moved to characterizing the role of reassortment in the setting of rotavirus-like  
152 epidemiology and immune modeling. Reassortment rates had little effect on prevalence  
153 variability in the simulations when coupled with low levels of specific immunity characteristic  
154 of stable levels of infection, as assessed by coefficient of variation over two-year time windows  
155 (**Figure S2**). However, reassortment had a major impact on the genetic structure of the  
156 population (**Figure 1B, C**). This genetic structure is measured in two ways. First, Simpson  
157 diversity, representing the effective number of segment types at a locus, and can be calculated  
158 as one over the probability that two serotypes randomly selected from a sample will share the  
159 same segment at the locus. Second, we measure the amount of niche overlap as the fraction of  
160 shared segment alleles between strains from randomly sampled infected hosts, excluding  
161 antigenically identical strains. In the absence of serotype-specific immunity ( $\sigma_{\text{spec}}=0$ ), segment  
162 alleles are neutral, and a single serotype persists for the duration of the simulation (**Figure 2B**).  
163 In previous studies, in the context of a finite antigenic pool and strong specific immunity,  
164 reassortment had a limited effect on strain structure<sup>4</sup>. Here, we see that with lower levels of  
165 specific immunity and with the repeated introduction of antigenic novelty, reassortment results  
166 in increased niche overlap, higher diversity of strains, and more complex strain dynamics  
167 (**Figure 1B, C, Figure 2A, C, D, E**). As expected, however, the formation of a strain structure  
168 with reduced niche overlap is substantially diminished with higher reassortment rates (**Figure**  
169 **2D, E**).



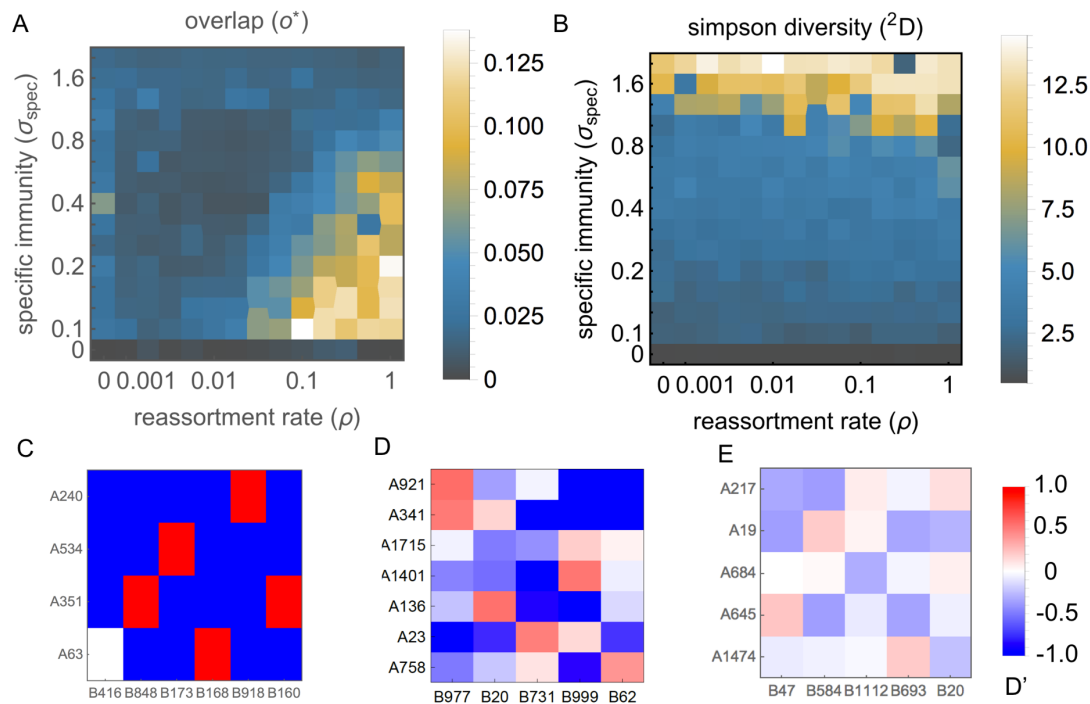

170

171 **Figure 2 Serotype community structure with varying specific immunity and reassortment rates.** *A.* The mean segment  
 172 overlap between serotypes as a function of specific immunity and the rate of reassortment. Segment overlap was calculated as  
 173 the fraction of shared segments between randomly sampled (non-identical) serotypes during 200 simulated years (parameters:  
 174  $\beta = 3.51$ ,  $\sigma_{gen} = 0.4$ ,  $i_1 = 8 \text{ year}^{-1}$ ). *B.* The Simpson diversity ( $1/\lambda$  or  $^2D$ ) of one of three antigenic loci during 200 simulated  
 175 years, with varying specific immunity and reassortment rates. In the absence of specific immunity, a single segment serotype is  
 176 present determined by the random fixation of a newly introduced alleles. With increasing specific immunity, segment diversity  
 177 increases with their fixation promoted by a frequency-dependent competitive advantage. Reassortment promotes segment  
 178 diversity for intermediate levels of specific immunity. *C.* The mean normalized linkage disequilibrium ( $D'$ ) between two  
 179 segments at the first two of three antigenic loci. Without reassortment, clear linkage appears only in combination with a single  
 180 other segment, indicating the reduced prevalence of strains which share more than one segment. ( $\sigma_{spec} = 0.25$ ,  $\rho = 0$ ). *D.*  
 181 Linkage disequilibrium with increasing reassortment rate ( $\sigma_{spec} = 0.25$ ,  $\rho = 0.1$ ) *E.* Increasing overlap and reduced linkage  
 182 disequilibrium with an even higher reassortment rate ( $\sigma_{spec} = 0.25$ ,  $\rho = 1$ ).

183 In previous models which generate discrete strain structure, antigenically differentiated strains  
 184 were maintained through the suppression of recombinant strains by the combined immunity of  
 185 the host population against the parental strains<sup>2</sup>. Here, additional competitive forces exist in the  
 186 form of selection which favors strains carrying novel antigenic segment alleles, specifically in

187 relation to their parental backgrounds; evidence for which is seen in the form of largely non-  
188 overlapping strain structure indicating the extinction of the background strains on which new  
189 segment alleles were introduced (**Figure 2C**). Importantly, with reassortment new segments  
190 can travel across multiple backgrounds. Following an introduction, reassortment is initially  
191 favored; allowing the introduction of new invading alleles which quickly associate with  
192 multiple backgrounds until they reach their frequency dependent equilibrium and the benefit of  
193 reassortment diminishes (**Figure S3A**). This movement of new segments through multiple  
194 backgrounds transiently destabilize the otherwise stable coexistence of largely non-overlapping  
195 strains (**Figure 1B-C**).

196

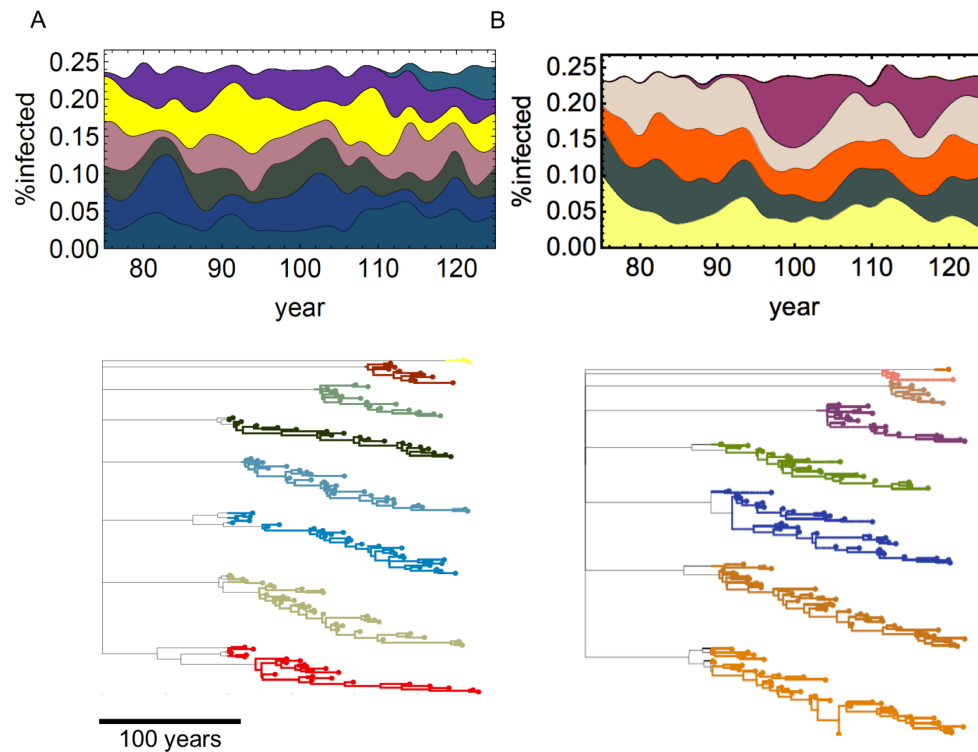

197

198 *Figure 3 A-B. Cumulative prevalence and simulated genealogy. Cumulative prevalence now at a single locus, color coded*  
199 *for the different segment serotypes. The corresponding simulated genealogy is also shown. New segment serotypes*  
200 *simulated to share an ancient source of coalescence in a source of unlimited diversity. A. low reassort rate  $\sigma_{spec} = 0.25$ ,  $\rho =$*   
201 *0.1 B. high reassortment rate  $\sigma_{spec} = 0.25$ ,  $\rho = 1$ . Changes in the relative prevalence of individual segments are less*  
202 *pronounced in comparison to changes in strain composition (Figure 1). The simulated genealogy is comparable to the*  
203 *genealogy of rotavirus G protein (Figure S4) in the presence of long term co-existence of distinct segment genotypes.*

204 Surprisingly, at low specific immunity levels, this change in the composition of strains (**Figure**  
205 **1B, C**) with increasing reassortment rate has a limited effect on the prevalence and diversity of  
206 individual segments (**Figure 3A, B**). The genealogy resulting from these simulations is  
207 comparable to the inferred genealogy of rotavirus (**Figure S4**) in the presence of long term co-  
208 existence of distinct segment genotypes. A degree of stability in the prevalence of established  
209 types, despite changes in strain composition is consistent with observed patterns in  
210 epidemiological surveys of rotavirus<sup>36</sup>.

211

## 212 **Strain structure from empirical rotavirus sequence data**

213 To measure the number of associations of different G and P types in rotavirus we use a sample  
214 of globally available *rotavirus A* genotypes collected from publically available sequence data  
215 between 1990-2015<sup>27</sup>. Before 1995 four G genotypes (G1, G2, G3, G4) were the most  
216 prevalent worldwide in humans, and typical G-P combinations including G1P[8], G2P[4],  
217 G3P[8] and G4P[8] were responsible for the majority of rotavirus diarrhea among children<sup>28</sup>.  
218 An additional genotype G8, of likely bovine origin has been identified as a common cause of  
219 rotavirus infection in humans, especially in Africa during the 1990s<sup>44,45</sup>. Since 1995 the G9  
220 genotype has become increasingly more common and has been observed in association with  
221 multiple P type backgrounds<sup>23,46,47</sup>. In addition, G12 genotype strains have been found to  
222 circulate in most parts of the world since the start of the new millennium<sup>23,48</sup>. In both the case  
223 of G9 and G12 a single lineage was found to be responsible for the majority of worldwide  
224 spread with a suspected origin in pigs, while multiple previous human infections have been  
225 recorded<sup>17</sup>.

226

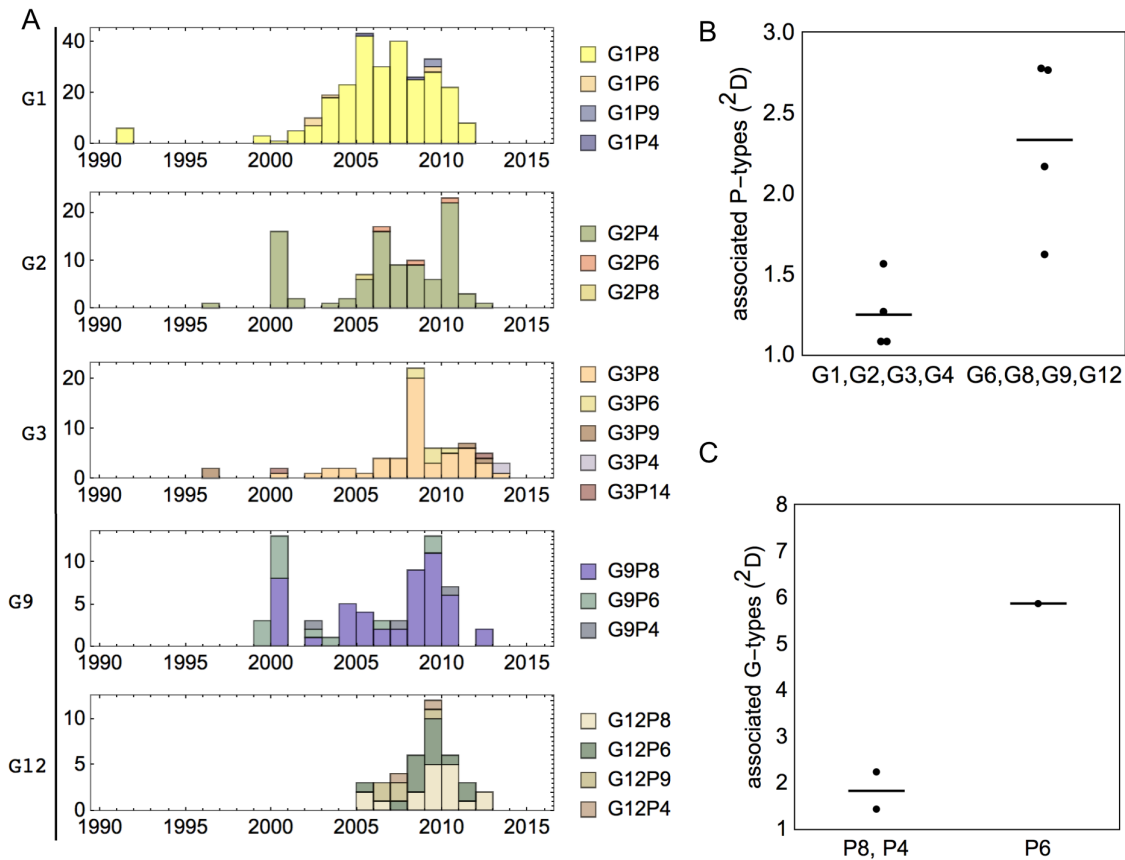

227

228 *Figure 4 Diversity of association in publicly available G-P genotypes a sample of 588 globally available human rotavirus*  
 229 *A genotypes collected from publicly available sequence data between 1990-2015 (Woods et al. 2015) A. Cumulative sample*  
 230 *timeseries for G-P genotypes grouped by their G type, showing representative 'established' G types (G1-G3) and more*  
 231 *recently widespread G types (G9-G12) B. Simpson diversity of publicly available G-P genotypes contrasting between*  
 232 *established (G1-G4) and more recently widespread (G6, G8, G9, G12) G-types. C. Simpson diversity of publicly available*  
 233 *G-P genotypes contrasting between established (P8, P4) and more recently widespread (P6) P-types*

234 We compare the diversity of G-P genotypes, contrasting between established (G1, G2, G3, G4)  
 235 and more recently introduced (G6, G8, G9, G12) G-types as defined in<sup>26,28,49</sup>. In **Figure 4A** we  
 236 plot the sampling frequency of common rotavirus genotypes grouped by sharing a G protein  
 237 genotype/serotype<sup>50</sup>. G types that have become more prevalent recently show associations with  
 238 multiple P types, consistent with the model's behavior of movement through different  
 239 established backgrounds. By contrast, the established genotypes are associated with fewer P  
 240 backgrounds ( $p=0.03$ , T-test two-tailed): thus, G1-G4 are associated on average with 1.2 P-

241 types (Inverse Simpson index) compared to 2.3 types for the more recent G6, G8, G9 and G12  
 242 (**Figure 4B**). Similarly, P6, which has recently become more widespread is associated with 5.9  
 243 G-types compared to 1.8 G-types on average for P4 and P8 (**Figure 4C**) ( $p=0.01$ , likelihood  
 244 ratio test comparing a single normal-distribution with two sharing a common variance). The  
 245 decrease diversity of associated backgrounds for established types is not observed in the  
 246 model, a departure we address in the discussion.

247

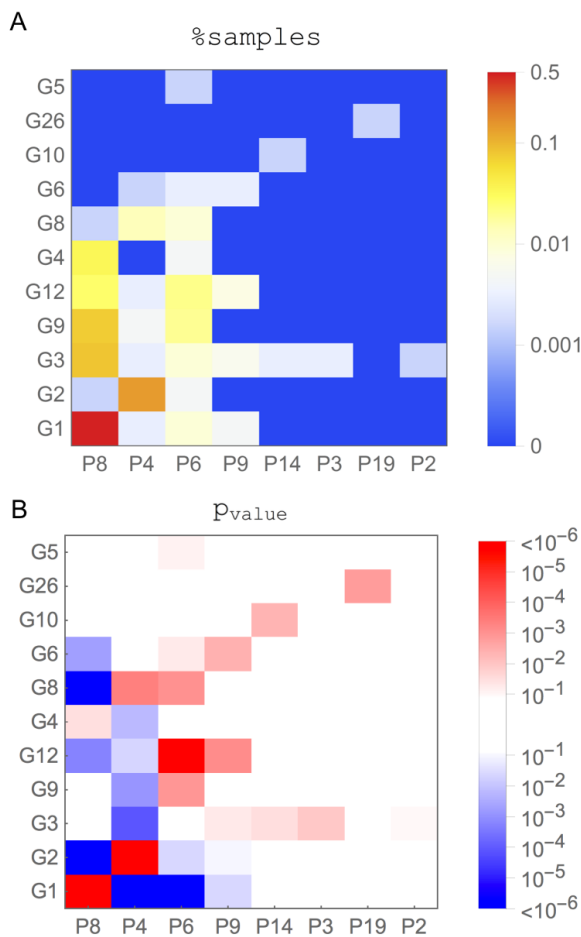

**Figure 5 Sampling and deviation from equilibrium frequency for publicly available G-P genotypes.** **A** The percent of samples for different G-P genotype combinations in publicly available sequence data<sup>27</sup>. P and G segments are ordered by their prevalence. **B** The p-value for a specific G-P pair being above or below its expected frequency. P-values were calculated using Fisher's exact test between G-P pairs using a two-tailed test and are colored red or blue based on the pair abundance being below or above its random expectation (respectively). Deviations from expected frequencies establish a checker-board pattern, consistent with selection for low overlap between dominant strains (e.g. G1P[8] and G2P[6]), seen in the lower-left corner. Interestingly, positive deviations for the associations of more recently invading segments (e.g. G12) are with P types that are not found in frequent partnerships already, such as P6. Note the corresponding dominance of red boxes towards the right and upper corner, which represents a part of immunity space in the host population that should be more open, given the low frequency of the corresponding pairs and segments.

267

268 Next, we examine empirical evidence of strain structure in the form of weakly overlapping  
 269 niches as predicted by theory. We plot the abundance of different G-P genotype combinations  
 270 (**Table S1**) in matrix form, ordered from the most prevalent to the least prevalent segment

271 types (**Figure 5A**). In addition, we plot the p-value for a specific G-P pair being above or  
272 below its expected abundance if segment associations were random while maintaining the  
273 same number of segments for each type. We observe significant departures from random  
274 expectations based on frequency. These departures show a checkerboard pattern of enhanced  
275 and reduced linkage, indicating reduced strain overlap ( $\phi=0.06$ ,  $p<0.00001$ ,  $N=668$ ) in  
276 comparison to the random expectations based on and suggestive of niche differentiation  
277 through competitive interactions. In the simulation, such patterns of linkage were observed in  
278 the presence of specific immunity and with a limited amount of reassortment. In the absence of  
279 specific immunity, competition for a single resource prevented the co-existence of multiple  
280 strains, while high levels of reassortment resulted in reduced niche differentiation and a smaller  
281 deviation from random linkage expectations.

282

283 The most common and non-overlapping combinations of G-P types, G1P[8] and G2P[4], have  
284 a higher abundance than expected based on segment prevalence alone (**Figure 4B**). G3 ranking  
285 next in abundance is associated with multiple backgrounds, with the association with P[6], P[9]  
286 and with P[3] in a higher proportion than expected by chance, conforming to non-overlapping  
287 combinations with the most common genotypes G1P[8] and G2P[4]. For the more recent G-  
288 types, G9 and G12 ranking next in their abundance. Despite having high abundance in  
289 association with multiple backgrounds, in particular with P8 which can be trivially expected  
290 from the high frequency of this P type, these more recent G-types are more abundant than  
291 expected in association with rarer P types including P6 and P9. These positive deviations are  
292 therefore seen for associations that would constitute relatively open niches in the immune  
293 landscape of the host. Similarly, negative deviations, for example for G12P[8], occur for  
294 associations with segments such as P8 that are already common in resident strains. The inferred  
295 origin of recent G type invasions to humans (such as G9 and G12) from a single lineage<sup>17</sup>,

296 suggests that the observed associations with multiple backgrounds are the consequence of post  
297 invasion reassortment which is not limited to the initial invading background. Furthermore,  
298 these multiple associations are consistent with invading G-types and P-types favoring  
299 association with rarer backgrounds as the result of the limited availability of open niches. In  
300 addition, rarer G-types (G6, G10, G26) have higher abundance than expected by chance in  
301 association with less common P types (P9, P14, P19). Although it is likely that these  
302 associations represent the original association present during spillover events, we should  
303 consider the possibility that such spillovers would not have occurred in the context of occupied  
304 niches.

305  
306 Rotavirus displays temporal and spatial variation in strain composition. To address patterns of  
307 niche differentiation at this scale we interrogate sequence data locally, at the country of origin  
308 level, and based on decade long time intervals (1985-1995, 1995-2005, 2005-2015). We  
309 calculated the community overlap of genotypes in a specific country and decade and the  
310 probability that this or a lower overlap of was generated by chance in a random assembly of  
311 global segment alleles. We find that e.g. in 2005-2015, for several countries including e.g. the  
312 U.S. ( $o=0.16$ ,  $p=0.013$ ,  $n=54$ ), China ( $o=0.05$ ,  $p<0.0001$ ,  $n=27$ ), Australia ( $o=0.012$ ,  $p<0.0001$ ,  
313  $n=85$ ) and Paraguay ( $o=0.16$ ,  $p=0.008$ ,  $n=33$ ), serotype overlap was significantly lower in  
314 comparison to random expectation (**Figure S5, Figure S6**), a pattern consistent with immune  
315 mediated niche partitioning. In addition, the associations that are significantly higher than  
316 expected at random, often vary between different countries supporting the role of immune  
317 mediated niche partitioning.

## 318 DISCUSSION

319 The role of competitive interactions in the formation and maintenance of viral strains is a  
320 subject of ongoing investigation. This research complements the emphasis that has been given



321 to interspecies transmission events in the emergence of viral subtypes and serotypes, and to  
322 epistatic interactions limiting the associations between different segment alleles. In this study,  
323 we evaluated the role of immune-mediated competitive interactions in the formation of  
324 serotypes in a model that captures major aspects of rotavirus dynamics, and is applicable to  
325 other viruses, in particular ones which encounter reassortment in the face of the repeated  
326 introduction of antigenic novelty from a diverse source, such as the zoonotic reservoir, and  
327 ones with limited type-specific immunity. We show that under these conditions strain structure  
328 can emerge, and involves a balance between competitive forces driving immune-mediated  
329 niche differentiation, and disturbance to this structure by repeated invasions and frequent  
330 reassortment. Existing rotavirus sequence data exhibits a non-random structure which is  
331 consistent with this dynamical regime.

332

333 In contrast to viral infections such as influenza, where antigenic changes have been shown to  
334 result in increased epidemic size, serotype turnover in rotavirus has limited impact on yearly  
335 incidence<sup>36,51</sup>. We capture this type of behavior in our simulation when specific immunity is  
336 sufficiently low. The presence of specific immunity, even at relatively modest levels, confers a  
337 selective advantage to newly introduced segments, and promotes their invasion. The selective  
338 advantage of invading segments while they are rare promotes their association with multiple  
339 backgrounds through reassortment. Segments invading on existing backgrounds, can lead to  
340 the extinction of their background strains. For low levels of reassortment a degree of niche  
341 differentiation between strains is maintained. However, there is a limit to the ability to  
342 maintain strain structure and with low enough specific immunity, reassortment can readily  
343 break the signature of full niche partitioning.

344

345 Evolutionary and ecological processes other than immunity take part in generating pathogen  
346 strains. For instance, different subtypes of influenza A (i.e A/H1N1, A/H3N2, A/H5N7)  
347 represent separate spillover events from an avian reservoir, with a possible intermediate host<sup>52</sup>.  
348 While reduced cross-immunity in this case appears as a by-product of non-immune processes,  
349 and strong epistatic interactions are present<sup>53</sup>, mechanisms similar to the ones suggested in the  
350 model are evident in the maintenance of strain structure in influenza. Reassortment between  
351 subtypes combined with competitive interactions has allowed the displacement of one  
352 influenza subtype A/H2N2 by another A/H3N2<sup>54</sup>, and antigenic shift allows for novel viral  
353 antigens which are less frequent, such as pandemic A/H1N1 to invade<sup>55</sup>. It is probable that  
354 immune mediated frequency dependent competition may also be at play in allowing spillovers  
355 from specific subtypes such as A/H5N7 to occur, while preventing e.g. the reintroduction of  
356 existing subtypes from occupied niches<sup>56</sup>. Additional non-immunity based processes, such as  
357 geographical isolation, tissue, and host tropism can also generate viral strains<sup>57-59</sup>. Importantly,  
358 non-immune mechanisms can work in tandem with immune mediated ones to generate and  
359 maintain pathogen strains and to reinforce niche differentiation. Both are likely to play a role in  
360 shaping diversity patterns in rotavirus.

361  
362 Consistent with the simulation, we observe the rapid association of recently introduced G and P  
363 types with diverse partners (**Figure 4**). However, in contrast with simulation, established  
364 serotypes maintain a fixed number of associations for prolonged durations (**Figure S3A**). We  
365 attribute the higher number of associations of older G and P types to missing components in  
366 our model, namely, a higher fitness for preferred genome constellations<sup>26</sup>. When a  
367 ‘crystallization’ mechanism was introduced, overall association diversity was reduced, and  
368 when reassortment was sufficient to generate multiple associations newly introduced segments  
369 showed an increasing diversity of association followed by a decline (**Figure S3B**). Further,

370 research into this suggested mechanism and the role of fitness differences, in generating this  
371 and additional patterns of strain diversity in rotavirus is necessary. An additional missing  
372 component is the composition of additional genome segments, and their organization into  
373 genogroups. Instead, to maintain the simplicity of our model we considered three equivalent  
374 antigenic segments. Finally, a model which considers population sizes, and effective  
375 population sizes and structure, consistent with the ones observed in rotavirus may help in  
376 future research and in distinguishing neutral from non-neutral evolutionary patterns. However,  
377 rotavirus strains experience global circulation and there is no clear association between  
378 different strains and geographic regions, suggesting geographic population structure isn't  
379 sufficient to maintain the observed serotype dynamics.

380

381 We have shown that a coexistence regime exhibits in rotavirus a non-random structure with a  
382 signature of competitive interactions and weakly-overlapping niches between strains. Our  
383 results suggest that dramatic changes in serotype composition can occur without a dramatic  
384 change in standing generalized immunity. Moreover, targeted interventions, identifying shared  
385 commonly recognized antigens, may identify transient sweeping alleles as being most  
386 common. These alleles may have no inherent fitness differences compared to other alleles, with  
387 the exception of a transiently higher host susceptibility. As such, targeted vaccination against  
388 these alleles may not offer higher efficacy. Finally, we expect some of the barriers on the  
389 formation and on the invasion of strains to originate from immune mediated competition,  
390 which can change in direction and composition with the introduction of vaccination, potentially  
391 leading to unexpected changes to strain composition. Reassortment, combined with zoonosis  
392 has been the mechanism behind the emergence of major recent pandemics such as the 2009  
393 H1N1 influenza pandemic. It is therefore crucial to understand the role the population  
394 susceptibility, specific and generalized, in preventing such spillover events from animal

395 sources, and to understand the potential of viral segments to reassort. As is the case with  
396 influenza, the study of the global diversity of rotavirus strains, both human and zoonotic is  
397 important in preventing the emergence of invading serotypes. All else being equal, a polyvalent  
398 vaccine leading to a higher vaccine breadth, would help reduce the potential for new strains  
399 which are substantially different from the vaccine strain to invade or form through  
400 reassortment. A dramatic shift in serotype composition may result in small but important  
401 differences in immunity; a reduction in efficacy of 5-10% can nonetheless result in tens of  
402 thousands of lives.  
403

404 METHODS

405 *Table 1 Model Parameters*

| description                                         | symbol           | value                                                 | ref                   |
|-----------------------------------------------------|------------------|-------------------------------------------------------|-----------------------|
| contact rate of symptomatic infection               | $\beta$          | $1.0 \text{ day}^{-1}$ or<br>$3.514 \text{ day}^{-1}$ | <sup>60</sup>         |
| duration of infection                               | $\frac{1}{\rho}$ | $7.0 \text{ days}$                                    | <sup>60</sup>         |
| homotypic immunity                                  | $\sigma_{gen}$   | $0.2-0.6$                                             | <sup>43,60,61</sup> * |
| heterotypic immunity                                | $\sigma_{spec}$  | $0-2.0$                                               |                       |
| mutation rate                                       | $\mu$            | $0$                                                   |                       |
| introduction rate                                   | $i_I$            | $0-32 \text{ year}^{-1}$                              |                       |
| probability of first infection to be symptomatic    | $x_0$            | $0.47$                                                | <sup>60</sup>         |
| Reduction in infectivity with subsequent infections | $\xi$            | $0.62$                                                | <sup>60</sup>         |
| Population size                                     | $N$              | $10,000,000$                                          |                       |
| number of viral segment types                       | $N_S$            | $3$                                                   |                       |

406 \* also see **Figure S1**

407

408 **Model Description**

409 In previous models, strong immunity against each segment allele, was necessary for antigenic  
410 niche differentiation between strains <sup>2,4,40</sup>. Cohort studies and vaccine studies suggest rotavirus  
411 departs significantly from these assumptions in that: 1. multiple infections are possible, with a  
412 diminishing probability based on the number of previous infections, and 2. much of the  
413 immunity gained is generalized, that is a host infected with one strain gains some portion of  
414 protection against all strains 3. the portion of immunity that is specific to a strain is debated <sup>20-</sup>  
415 <sup>22</sup>. To better match these aspects of rotavirus epidemiology, we explore a range of parameters  
416 and explicitly include both a generalized and a strain specific component to immunity. In our  
417 model, the risk of infection has a generalized component which follows an exponential decline

418 based on the number of previous infections with any rotavirus strain and a specific component  
419 which follows an exponential decline based on the fraction of segments in the current strain  
420 which have been seen before by the host in previous infections. In contrast with previous  
421 models, we include the arrival of newly introduced segment alleles<sup>36</sup>. These are introduced in  
422 the simulation at a given annual rate. Reassortment is also modeled, and when a host is  
423 infected with multiple viral strains segments are reassorted with a certain probability. Model  
424 parameters are listed in **Table 1**.

425

426 More specifically, a host's risk of infection follows an exponential decline based on the  
427 number of infections and the number of unique antigenic segments to which that the host has  
428 previously been exposed:

429

$$e^{-\sigma_{\text{gen}} \cdot n_i - \sigma_{\text{spec}} \frac{n_s}{N_s}} \quad (1)$$

430

431 where  $\sigma_{\text{gen}}$  is the level of heterotypic immunity,  $\sigma_{\text{spec}}$  is the level of homeotypic immunity,  $n_i$   
432 is the number of infections a host has already experienced,  $n_s$  is the number of segments the  
433 host has been exposed to previously, and  $N_s$  is the number of antigenic segments of the virus  
434 has ( $N_s=3$  for all the simulations reported here). Immunity is gained upon recovery from an  
435 infection.

436

437 Only symptomatic infections transmit in our model. The first infection is symptomatic with  
438 probability  $x_0$ . The chances of a host transmitting an infection declines exponentially with each  
439 infection at a rate  $\xi$  according to

440

$$x_0 e^{-\xi \cdot n_i} \quad (2)$$

441

442 Epistatic interactions are modeled as a reduction in the infectivity of novel segment  
443 associations. Following a reassortment or introduction event the probability of infection is  
444 reduced by the following factor.

445

$$1 - \alpha \cdot e^{-\frac{t}{\tau}} \quad (3)$$

446

447 where  $t$  is the time since the reassortment or introduction event and  $\alpha=0.5$  and  $\tau = 1/20$  are  
448 the reduced compatibility magnitude and co-adaptation rate parameters.

449

450 Antigenically novel segments are introduced at a rate  $i_j$  in the context of an existing  
451 background present in the population. That is, an introduction brings into the population one  
452 new segment in the background of an existing constellation. These new segments are derived  
453 from an initial parent segment at the same loci sampled at the beginning of the simulation, to  
454 reflect their distant coalescence, possibly in a source animal or region.

455

456 Infected hosts are exposed to additional new infections. A co-infection may involve multiple  
457 circulating serotypes, and repeated infection with the same serotype. When a host infected with  
458 multiple serotypes transmits an infection, a single infecting serotype is generated and selected  
459 from the existing infecting serotypes. For the infecting serotype, a random parent serotype is  
460 selected, and with probability  $\rho$  each segment in this serotype is replaced by a random segment  
461 allele at the same loci, from all the infecting serotypes (including the parent strain).

462

463 A fraction ( $2 \cdot 10^{-4}$ ) of infected hosts is sampled daily in the simulation, starting at the end of  
464 an initialization period lasting 50 years. When a host is sampled all infecting strains and  
465 segments are recorded. In addition, the immune history of a fraction ( $4 \cdot 10^{-6}$ ) of all hosts  
466 (infected and non-infected) is sampled daily. Prevalence in simulated cumulative and  
467 frequency plots, is aggregated at two-year time windows and interpolated within windows  
468 using cubic interpolation. To capture epidemic dynamics, **Figure 1A** samples were aggregated  
469 at a shorter time period of six months.

470

#### 471 **Statistical information**

472 A two-tailed T-test was used to compare the association diversity of established and more  
473 recent G types (N=8). A likelihood ratio test comparing a single normal-distribution with two  
474 sharing a common variance was used when comparing the number of associations of different  
475 P types (N=3), with limitations at this sample size. The two comparisons (P-types and G-types)  
476 are not completely independent.

477

478 Segment overlap was calculated as the fraction of shared segments between pairs of randomly  
479 sampled serotypes when sampling with returns and discarding samples with identical serotype.  
480 The significance of overlap statistics (o) in individual countries and globally was determined  
481 by comparison to the same number of serotypes assembled from a random collection of G and  
482 P types sampled from the global pool. P-values which include a less than (<) sign, relate to  
483 limitations based on the number of randomizations ( $p < 2/N$ ) performed.

484

485 P-values for identifying G-P pair abundance being below or above random expectation were  
486 calculated using a two tailed Fisher's exact test.

487

#### 488 **Data Availability**



489 The ‘strain IDs’ of rotavirus genomes used in the analysis are included in a supplementary  
490 excel file. Details about the selection criteria for sequences can be found in Woods et al.<sup>27</sup>.

491

#### 492 **Code availability**

493 Code for simulations is available at [github.com/dzinder/segmentree](https://github.com/dzinder/segmentree).

494

#### 495 REFERENCES

- 496 1. Grenfell, B. T. Unifying the Epidemiological and Evolutionary Dynamics of Pathogens.  
497 *Science* **303**, 327–332 (2004).
- 498 2. Gupta, S. *et al.* The maintenance of strain structure in populations of recombining  
499 infectious agents. *Nat Med* **2**, 437–442 (1996).
- 500 3. Lipsitch, M. & O’Hagan, J. J. Patterns of antigenic diversity and the mechanisms that  
501 maintain them. *J. R. Soc. Interface* **4**, 787–802 (2007).
- 502 4. Buckee, C. O., Recker, M., Watkins, E. R. & Gupta, S. Role of stochastic processes in  
503 maintaining discrete strain structure in antigenically diverse pathogen populations. *Proc.*  
504 *Natl. Acad. Sci.* **108**, 15504–15509 (2011).
- 505 5. Artzy-Randrup, Y. *et al.* Population structuring of multi-copy, antigen-encoding genes in  
506 *Plasmodium falciparum*. *eLife* **1**, (2012).
- 507 6. Zinder, D., Bedford, T., Gupta, S. & Pascual, M. The Roles of Competition and Mutation in  
508 Shaping Antigenic and Genetic Diversity in Influenza. *PLoS Pathog* **9**, e1003104 (2013).
- 509 7. Cobey, S. Pathogen evolution and the immunological niche: Evolution of pathogen  
510 diversity. *Ann. N. Y. Acad. Sci.* **1320**, 1–15 (2014).
- 511 8. Gause, G. F. The struggle for existence, 163 pp. *Williams Wilkins Baltim.* (1934).

- 512 9. Hutchinson, G. E. The multivariate niche. in *Cold Spr. Harb. Symp. Quant. Biol* **22**, 415–421  
513 (1957).
- 514 10. MacArthur, R. & Levins, R. The limiting similarity, convergence, and divergence of  
515 coexisting species. *Am. Nat.* 377–385 (1967).
- 516 11. Abrams P. *The theory of limiting similarity*. **14**, (Annual Reviews, 1983).
- 517 12. Scheffer, M. & van Nes, E. H. Self-organized similarity, the evolutionary emergence of  
518 groups of similar species. *Proc. Natl. Acad. Sci.* **103**, 6230–6235 (2006).
- 519 13. Cavender-Bares, J., Kozak, K. H., Fine, P. V. A. & Kembel, S. W. The merging of community  
520 ecology and phylogenetic biology. *Ecol. Lett.* **12**, 693–715 (2009).
- 521 14. HilleRisLambers, J., Adler, P. B., Harpole, W. S., Levine, J. M. & Mayfield, M. M. Rethinking  
522 community assembly through the lens of coexistence theory. *Annu. Rev. Ecol. Evol. Syst.*  
523 **43**, 227–248 (2012).
- 524 15. Chesson, P. Mechanisms of maintenance of species diversity. *Annu. Rev. Ecol. Syst.* **31**,  
525 343–366 (2000).
- 526 16. Kapikian, A. Z. A rotavirus vaccine for prevention of severe diarrhoea of infants and young  
527 children: development, utilization and withdrawal. in *Novartis Foundation Symposium*  
528 153–179 (Chichester; New York; John Wiley; 1999, 2001).
- 529 17. Matthijssens, J. *et al.* Full Genome-Based Classification of Rotaviruses Reveals a Common  
530 Origin between Human Wa-Like and Porcine Rotavirus Strains and Human DS-1-Like and  
531 Bovine Rotavirus Strains. *J. Virol.* **82**, 3204–3219 (2008).
- 532 18. Ward, R. L., Clark, H. F. & Offit, P. a. Influence of potential protective mechanisms on the  
533 development of live rotavirus vaccines. *J. Infect. Dis.* **202 Suppl**, S72-9 (2010).

- 534 19. Ofit, P. a. Host factors associated with protection against rotavirus disease: the skies are  
535 clearing. *J. Infect. Dis.* **174 Suppl**, S59-64 (1996).
- 536 20. Crawford, S. E. *et al.* Protective Effect of Natural Rotavirus Infection in an Indian Birth  
537 Cohort. 337–346 (2011).
- 538 21. Velazquez, F. R. *et al.* Cohort study of rotavirus serotype patterns in symptomatic and  
539 asymptomatic infections in Mexican children. *Pediatr. Infect. Dis. J.* **12**, 54–61 (1993).
- 540 22. Leshem, E. *et al.* Distribution of rotavirus strains and strain-specific effectiveness of the  
541 rotavirus vaccine after its introduction: a systematic review and meta-analysis. *Lancet*  
542 *Infect. Dis.* **14**, 847–856 (2014).
- 543 23. Matthijssens, J. *et al.* Phylodynamic analyses of rotavirus genotypes G9 and G12  
544 underscore their potential for swift global spread. *Mol. Biol. Evol.* **27**, 2431–2436 (2010).
- 545 24. Arista, S. *et al.* Heterogeneity and Temporal Dynamics of Evolution of G1 Human  
546 Rotaviruses in a Settled Population. *J. Virol.* **80**, 10724–10733 (2006).
- 547 25. McDonald, S. M., Davis, K., McAllen, J. K., Spiro, D. J. & Patton, J. T. Intra-genotypic  
548 diversity of archival G4P [8] human rotaviruses from Washington, DC. *Infect. Genet. Evol.*  
549 **11**, 1586–1594 (2011).
- 550 26. McDonald, S. M. *et al.* Evolutionary Dynamics of Human Rotaviruses: Balancing  
551 Reassortment with Preferred Genome Constellations. *PLoS Pathog.* **5**, e1000634 (2009).
- 552 27. Woods, R. J. Intrasegmental recombination does not contribute to the long-term  
553 evolution of group A rotavirus. *Infect. Genet. Evol.* **32**, 354–360 (2015).

- 554 28. Santos, N. & Hoshino, Y. Global distribution of rotavirus serotypes/genotypes and its  
555 implication for the development and implementation of an effective rotavirus vaccine.  
556 *Rev. Med. Virol.* **15**, 29–56 (2005).
- 557 29. Heiman, E. M. *et al.* Group A human rotavirus genomics: evidence that gene  
558 constellations are influenced by viral protein interactions. *J. Virol.* **82**, 11106–11116  
559 (2008).
- 560 30. Lipsitch, M., Colijn, C., Cohen, T., Hanage, W. P. & Fraser, C. No coexistence for free:  
561 neutral null models for multistrain pathogens. *Epidemics* **1**, 2–13 (2009).
- 562 31. Lipsitch, M., Siller, S. & Nowak, M. A. The evolution of virulence in pathogens with vertical  
563 and horizontal transmission. *Evolution* 1729–1741 (1996).
- 564 32. Levin, S. & Pimentel, D. Selection of intermediate rates of increase in parasite-host  
565 systems. *Am. Nat.* 308–315 (1981).
- 566 33. van Veelen, M., Luo, S. & Simon, B. A simple model of group selection that cannot be  
567 analyzed with inclusive fitness. *J. Theor. Biol.* **360**, 279–289 (2014).
- 568 34. Maslov, S. & Sneppen, K. Population cycles and species diversity in dynamic Kill-the-  
569 Winner model of microbial ecosystems. *Sci. Rep.* **7**, (2017).
- 570 35. McDonald, S. M. *et al.* Diversity and relationships of cocirculating modern human  
571 rotaviruses revealed using large-scale comparative genomics. *J. Virol.* **86**, 9148–62 (2012).
- 572 36. Afrad, M. *et al.* Changing profile of rotavirus genotypes in Bangladesh, 2006–2012. *BMC*  
573 *Infect. Dis.* **13**, 320 (2013).

- 574 37. De Grazia, S. *et al.* Data mining from a 27-years rotavirus surveillance in Palermo, Italy.  
575 *Infect. Genet. Evol. J. Mol. Epidemiol. Evol. Genet. Infect. Dis.* 1–8 (2014).  
576 doi:10.1016/j.meegid.2014.03.001
- 577 38. Nakagomi, T. *et al.* Apparent extinction of non-G2 rotavirus strains from circulation in  
578 Recife, Brazil, after the introduction of rotavirus vaccine. *Arch. Virol.* **153**, 591–593 (2008).
- 579 39. Kirkwood, C. D., Boniface, K., Barnes, G. L. & Bishop, R. F. Distribution of Rotavirus  
580 Genotypes After Introduction of Rotavirus Vaccines, Rotarix® and RotaTeq®, into the  
581 National Immunization Program of Australia. *Pediatr. Infect. Dis. J.* **30**, S48–S53 (2011).
- 582 40. Zinder, D., Woods, R. J. & Pascual, M. Early signs of post-vaccination change in the USA  
583 rotavirus population through mutation, migration and shifting prevalence. in (Ecological  
584 Society of America, 2014).
- 585 41. Bedford, T., Rambaut, A. & Pascual, M. Canalization of the evolutionary trajectory of the  
586 human influenza virus. *BMC Biol.* **10**, 38 (2012).
- 587 42. Bedford, T. *et al.* Integrating influenza antigenic dynamics with molecular evolution. *Elife*  
588 **3**, e01914 (2014).
- 589 43. Gladstone, B. P. *et al.* Protective effect of natural rotavirus infection in an Indian birth  
590 cohort. *N. Engl. J. Med.* **365**, 337–346 (2011).
- 591 44. Cunliffe, N. A. *et al.* Molecular and Serologic Characterization of Novel Serotype G8  
592 Human Rotavirus Strains Detected in Blantyre, Malawi. *Virology* **274**, 309–320 (2000).
- 593 45. Cunliffe, N. A. *et al.* Rotavirus G and P types in children with acute diarrhea in Blantyre,  
594 Malawi, from 1997 to 1998: predominance of novel P [6] G8 strains. *J. Med. Virol.* **57**,  
595 308–312 (1999).

- 596 46. Rahman, M. *et al.* Predominance of rotavirus G9 genotype in children hospitalized for  
597 rotavirus gastroenteritis in Belgium during 1999–2003. *J. Clin. Virol.* **33**, 1–6 (2005).
- 598 47. Yang, X.-L. *et al.* Temporal changes of rotavirus strain distribution in a city in the  
599 northwest of China, 1996–2005. *Int. J. Infect. Dis.* **12**, e11–e17 (2008).
- 600 48. Rahman, M. *et al.* Evolutionary History and Global Spread of the Emerging G12 Human  
601 Rotaviruses. *J. Virol.* **81**, 2382–2390 (2007).
- 602 49. Matthijssens, J., Rahman, M., Ciarlet, M. & Van Ranst, M. Emerging human rotavirus  
603 genotypes. (2008).
- 604 50. Maes, P., Matthijssens, J., Rahman, M. & Van Ranst, M. RotaC: a web-based tool for the  
605 complete genome classification of group A rotaviruses. *BMC Microbiol.* **9**, 238 (2009).
- 606 51. Koelle, K., Cobey, S., Grenfell, B. & Pascual, M. Epochal Evolution Shapes the  
607 Phylodynamics of Interpandemic Influenza A (H3N2) in Humans. *Science* **314**, 1898–1903  
608 (2006).
- 609 52. Parrish, C. R., Murcia, P. R. & Holmes, E. C. Influenza Virus Reservoirs and Intermediate  
610 Hosts: Dogs, Horses, and New Possibilities for Influenza Virus Exposure of Humans: FIG 1.  
611 *J. Virol.* **89**, 2990–2994 (2015).
- 612 53. Kryazhimskiy, S., Dushoff, J., Bazykin, G. A. & Plotkin, J. B. Prevalence of Epistasis in the  
613 Evolution of Influenza A Surface Proteins. *PLoS Genet* **7**, e1001301 (2011).
- 614 54. Lindstrom, S. E., Cox, N. J. & Klimov, A. Evolutionary analysis of human H2N2 and early  
615 H3N2 influenza viruses: evidence for genetic divergence and multiple reassortment  
616 among H2N2 and/or H3N2 viruses. in *International Congress Series* **1263**, 184–190  
617 (Elsevier, 2004).

- 618 55. Webster, R. G. in *Origin and evolution of viruses*. 377–390 (Academic Press, San Diego,  
619 1999).
- 620 56. Nachbagauer, R. *et al.* Defining the antibody cross-reactome directed against the  
621 influenza virus surface glycoproteins. *Nat Immunol* **18**, 464–473 (2017).
- 622 57. Whitton, J. L., Cornell, C. T. & Feuer, R. Host and virus determinants of picornavirus  
623 pathogenesis and tropism. *Nat. Rev. Microbiol.* **3**, 765–776 (2005).
- 624 58. Bourhy, H. *et al.* The origin and phylogeography of dog rabies virus. *J. Gen. Virol.* **89**,  
625 2673–2681 (2008).
- 626 59. Holmes, E. C. & Zhang, Y.-Z. The evolution and emergence of hantaviruses. *Curr. Opin.*  
627 *Virol.* **10**, 27–33 (2015).
- 628 60. Pitzer, V. E. *et al.* Demographic Variability, Vaccination, and the Spatiotemporal Dynamics  
629 of Rotavirus Epidemics. *Science* **325**, 290–294 (2009).
- 630 61. Velázquez, F. R. *et al.* Rotavirus Infection in Infants as Protection against Subsequent  
631 Infections. *N. Engl. J. Med.* **335**, 1022–1028 (1996).
- 632 62. Drummond, A. & Rambaut, A. BEAST: Bayesian evolutionary analysis by sampling trees.  
633 *BMC Evol. Biol.* **7**, 214 (2007).
- 634
- 635

636 SUPPLEMENT

637

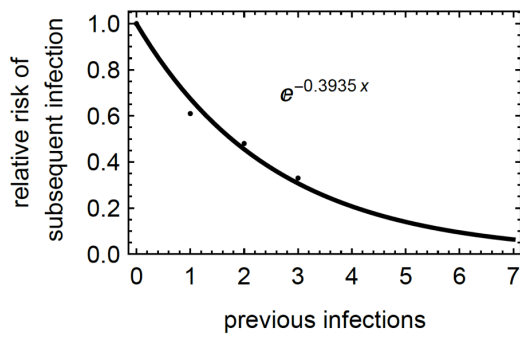

638

639

640 *Figure S1 Relative risk of subsequent infection modeled as an exponential decline with previous infections. Relative risk of*  
641 *subsequent infection in an Indian birth cohort was evaluated using data from Gladstone et al. 2011<sup>43</sup> and fitted with an*  
642 *exponential curve. The rate ( $\sigma_{gen}=0.3935$ ) offers an upper value estimate for the effect of generalized immunity on infection*  
643 *risk in this cohort.*

644



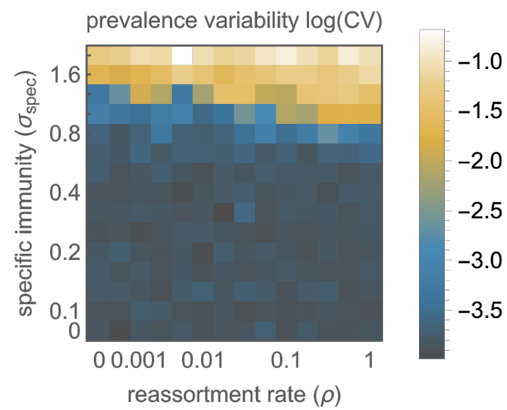

645

646 **Figure S2 Prevalence variability with varying specific immunity and reassortment rates, where antigenic novelty is driven**  
647 **by introductions from an unlimited pool.** Natural log of the prevalence coefficient of variation (CV) plotted as a function of  
648 the strength of specific immunity and of the reassortment rate. The CV was calculated as standard deviation divided by mean  
649 prevalence, when averaging two-year time intervals. Higher specific immunity causes increased prevalence variability and is  
650 associated with a regime which includes the replacement of strains rather than the coexistence of multiple strains.

651 Reassortment increases incidence variability only for intermediate levels of specific immunity, with an effect on serotype  
652 diversity but not on incidence variability for lower levels of specific immunity. (parameters:  $\beta=3.51$ ,  $\sigma_{\text{gen}}=0.4$ ,  $i_1=8 \text{ year}^{-1}$ ).

653

654

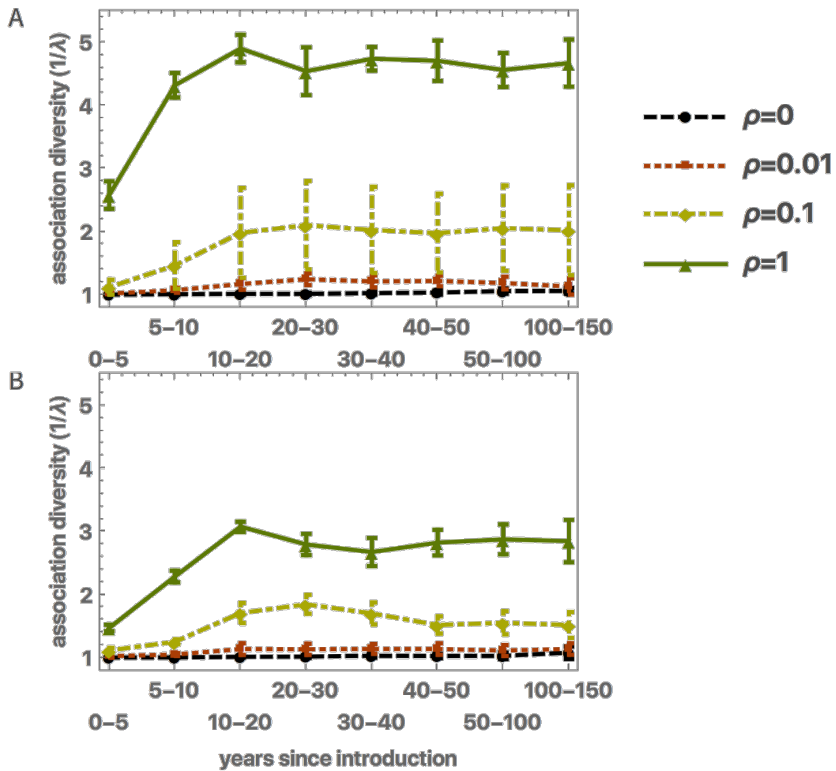

655

656

657 **Figure S3 Segment associations following introduction with varying rates of reassortment.** The diversity of associations ( $1/\lambda$   
 658 or  $^2D$ ), with segments at different loci, a segment experiences following its introduction. Results were averaged across 6  
 659 independent runs for each data point. **A.** A newly introduced segment has a selective advantage which in the presence of  
 660 reassortment can promote its association with more backgrounds. The number of associations a (non-extinct) newly  
 661 introduced segment has reached an equilibrium level dependent on the reassortment rate **B** When considering epistatic  
 662 interactions (see discussion) generating a fitness loss (50%) and regain ( $\tau=1/20 \text{ year}^{-1}$ ) following reassortment. (parameters:  
 663  $\beta = 3.51$ ,  $\sigma_{gen} = 0.4$ ,  $\sigma_{spec} = 0.25$ ,  $i_1=8 \text{ year}^{-1}$ )

664

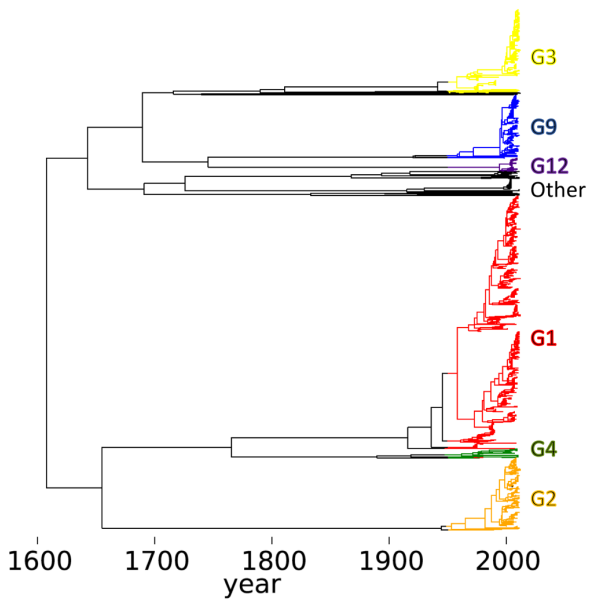

665  
666  
667  
668  
669

**Figure S4 The phylogeny of Rotavirus VP7.** The time-resolved phylogenetic tree of rotavirus A, VP7 segment (G protein) in humans. A single representative phylogeny of VP7 from the posterior distribution of trees, generated from a sample of 769 annotated GenBank sequence<sup>27</sup> using the phylogenetic inference package BEAST<sup>62</sup>, and color-coded by serotype.

670

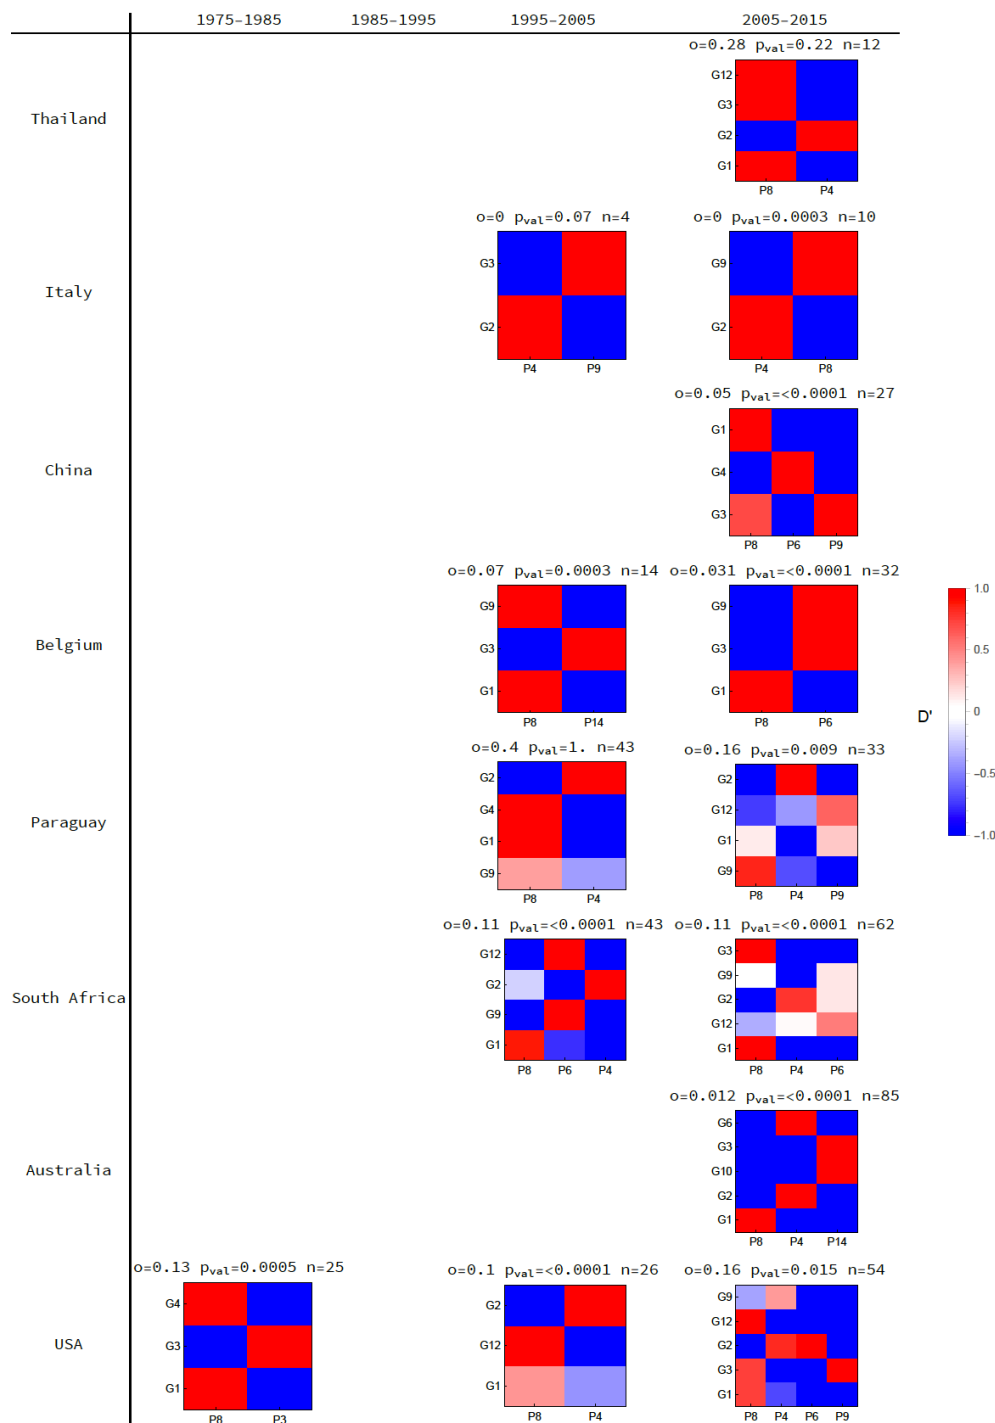

671  
 672 **Figure S5 Deviation from equilibrium frequency and expected overlap for publicly available G-P genotypes in different**  
 673 **countries.** The linkage disequilibrium ( $D'$ ) between different G-P genotype pairs in samples from a specified country during  
 674 decade long time intervals (1975-2015) was calculated using a curated sample of publicly available sequence data (Woods  
 675 *et al.* 2015). The overlap ( $o$ ) of G-P genotypes sampled ( $n$ ) in a country during a specified decade was calculated. The overlap  
 676 represents the average fraction of shared segments between pairs of non-identical genotypes. Country level overlap was  
 677 compared to the overlap in a random assembly of global segment alleles of the same sample size, the fraction of cases in which  
 678 such an assembly resulted in a lower or equal overlap is reported ( $p_{val}$ ). P and G segments are ordered by their prevalence in  
 679 each country and decade. Decades with at least two different genotypes were included. (Thailand, Italy, China, Belgium,  
 680 Paraguay, South-Africa, USA).

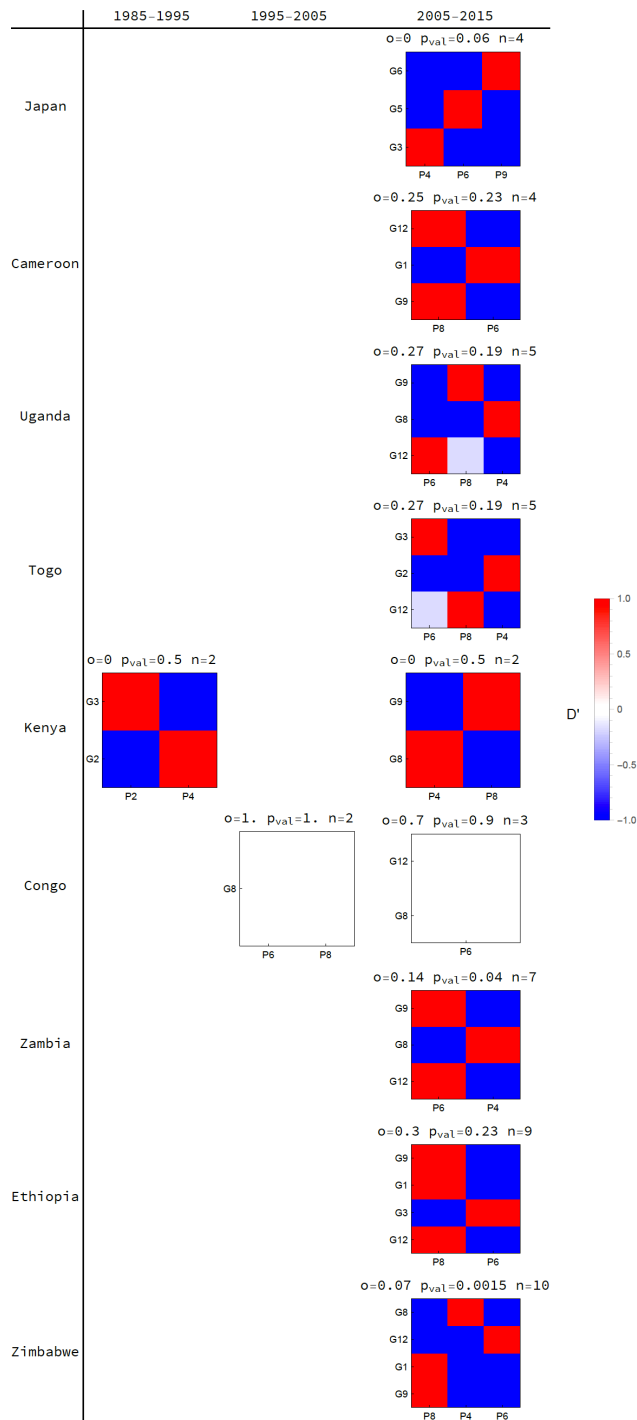

681  
 682 **Figure S6 Deviation from equilibrium frequency and expected overlap for publicly available G-P genotypes in different**  
 683 **countries.** The linkage disequilibrium ( $D'$ ) between different G-P genotype pairs in samples from a specified country during  
 684 decade long time intervals (1985-2015) was calculated using a curated sample of publicly available sequence data (Woods  
 685 et al. 2015). The overlap ( $o$ ) of G-P genotypes sampled ( $n$ ) in a country during a specified decade was calculated. The overlap  
 686 represents the average fraction of shared segments between pairs of non-identical genotypes. Country level overlap was  
 687 compared to the overlap in a random assembly of global segment alleles of the same sample size, the fraction of cases in which  
 688 such an assembly resulted in a lower or equal overlap is reported ( $p_{val}$ ). P and G segments are ordered by their prevalence in  
 689 each country and decade. Decades with at least two different genotypes were included. (Japan, Cameroon, Uganda, Togo,  
 690 Kenya, Congo, Zambia, Ethiopia, Zimbabwe).

691 *Table S1 Frequency of G, P and G-P type combinations in curated publically available human sequence data*<sup>27</sup>

| <b>G type</b> | <b>samples (%)</b> | <b>P type</b> | <b>samples (%)</b> | <b>G-P type</b> | <b>samples (%)</b> |
|---------------|--------------------|---------------|--------------------|-----------------|--------------------|
| G1            | 340 (51.0%)        | P[8]          | 476 (71.5%)        | G1P[8]          | 329 (49.4%)        |
| G2            | 101 (15.1%)        | P[4]          | 116 (17.4%)        | G2P[4]          | 97 (14.6%)         |
| G3            | 72 (10.8%)         | P[6]          | 54 (8.1%)          | G3P[8]          | 55 (8.2%)          |
| G9            | 66 (9.9%)          | P[9]          | 14 (2.1%)          | G9P[8]          | 50 (7.5%)          |
| G12           | 39 (5.9%)          | P[14]         | 3 (0.5%)           | G4P[8]          | 22 (3.3%)          |
| G4            | 25 (3.8%)          | P[3]          | 2 (0.3%)           | G12P[8]         | 18 (2.7%)          |
| G8            | 16 (2.4%)          | other         | 2 (0.3%)           | G12P[6]         | 14 (2.1%)          |
| G6            | 5 (0.8%)           |               |                    | G9P[6]          | 13 (2.0%)          |
| other         | 3 (0.4%)           |               |                    | G8P[4]          | 9 (1.4%)           |
|               |                    |               |                    | G8P[6]          | 6 (0.9%)           |
|               |                    |               |                    | G1P[6]          | 6 (0.9%)           |
|               |                    |               |                    | G3P[6]          | 6 (0.9%)           |
|               |                    |               |                    | G12P[9]         | 5 (0.8%)           |
|               |                    |               |                    | G3P[9]          | 4 (0.6%)           |
|               |                    |               |                    | other           | 33 (4.9%)          |
| total         |                    |               |                    |                 | 667 (100%)         |

692
